# Supplementary material for: MXene/WS2hybrids for visible-light-activated NO2sensing at room temperature
Source: Royal Society of Chemistry journal article supplement (doi:10.1039/d1cc03474j), 2021-01-01
Supplement: d1cc03474j1.pdf [file d1cc03474j1.pdf]

## Electronic Supplementary Information

### MXene/WS<sub>2</sub> 2D/2D hybrid films for visible-light-activated NO<sub>2</sub> sensing at room temperature

Yi Xia <sup>a, b</sup>, Sufang He <sup>b</sup>, Junming Wang <sup>b</sup>, Liexing Zhou <sup>b</sup>, Jing Wang <sup>c, \*</sup>, Sridhar Komarneni <sup>d, \*</sup>

<sup>a</sup> The Key Laboratory of Unconventional Metallurgy, Ministry of Education, Faculty of Metallurgical and Energy Engineering, Kunming University of Science and Technology, Kunming 650093, China

<sup>b</sup> Research Center for Analysis and Measurement, Kunming University of Science and Technology, and Analytic& Testing Research Center of Yunnan, Kunming 650093, China

<sup>c</sup> School of Chemical and Material Engineering, Jiangnan University, Wuxi 214122, China

<sup>d</sup> Department of Ecosystem Science and Management and Materials Research Institute, 204 Energy and the Environment Laboratory, The Pennsylvania State University, University Park, PA 16802, USA

## 1. Experimental

### 1.1. Materials Preparation

Chemical exfoliation method was applied to fabricate the 2D WS<sub>2</sub> nanosheets, which was conducted as follows: 15 mL hexane containing 2.0 M n-butyl lithium (Aladdin) and 0.8 g WS<sub>2</sub> powder (Sigma-Aldrich) were mixed in a conical flask with a volume of 30 mL, and the above mixture was stirred magnetically in a glove box filled with argon for 48 h. Thereafter, ethane was used to wash the above suspension for several times. The washed material was then filtered and dried in vacuum to obtain the intermediate product of Li<sub>x</sub>WS<sub>2</sub>. 100 mL water was used to initially disperse 0.5 g Li<sub>x</sub>WS<sub>2</sub> prepared above, followed by an ultrasonic treatment for 60 min for full dispersion. After that, the 2D WS<sub>2</sub> nanosheets were obtained by centrifugation at 1500 r/min to remove the massive excess liquid.

---

\* Corresponding authors. Email: [jingwang@jiangnan.edu.cn](mailto:jingwang@jiangnan.edu.cn) (J. Wang); [sxk7@psu.edu](mailto:sxk7@psu.edu) (S. Komarneni)

The 2D  $T_3C_2T_x$  nanosheets were fabricated by the following procedure: 1 g of LiF was dissolved in 20 mL of 6 M HCl solution using a 100 mL polypropylene plastic bottle. Then 1 g of  $Ti_3AlC_2$  was gradually added to the above solution and kept treated at 35°C for 24 h. After the reaction, the solid acid product was separated by centrifugation at 3500 r/min and washed with deionized water until the pH value was higher than 6. The dark green supernatant containing  $T_3C_2T_x$  nanoparticles was obtained after centrifugation for 1 h, and its concentration was up to 1.5 mg/mL.

The  $T_3C_2T_x/WS_2$  heterostructures were fabricated via a facile self-assembly route by mixing  $WS_2$  ultra-thin nanosheets and  $T_3C_2T_x$  nanosheets in methanol solution under vigorous stirring for 2 h at room temperature. Subsequently, the obtained product was filtered, washed, and stored in the mixed solution of deionized water and ethanol prior to characterization and gas sensing test.

### *1.2. Characterization*

The microstructures of samples were studied by a high-resolution transmission electron microscopy (HRTEM, Tecnai G2 TF30, FEI, USA) and a field emission scanning electron microscopy (FESEM, Nova NanoSEM 630, FEI, USA). The structures of samples were investigated by powder X-ray diffraction (XRD) using Rigaku Dmax-2200 diffractometer, Japan) with  $CuK\alpha$  radiation and an X-ray photoelectron spectroscopy (XPS) using PHI-5300 instrument, Philadelphia, USA. The photo-response performances of different sensors were examined by a digital source-meter (Keithley 2614B, Tektronix, USA) with 1 V voltage at 25°C. The photoluminescence (PL) spectra of samples were obtained on a luminescence spectrometer (F-7000, Hitachi, Japan) at room temperature equipped with a Xe lamp of 325 nm excitation.

### *1.3. Gas sensor fabrication and sensing performance tests*

In this work, (100) N-type silicon wafer was used as the sensing substrate, on the surface of which was a thermally grown  $SiO_2$  substrate with the thickness of 300 nm. Interdigital electrodes with both finger width and gap width of 10 nm fabricated by photolithography were spun by the  $WS_2$ -based suspension, and then dried at 90°C for 2 h. The homemade chamber used dry air as the carrier gas with the airflow of 200 mL/min and adjustable humidity from 0% to 80%, in which the obtained sensors were located and tested. The visible light was provided by an LED lamp with a Y-43 cut-off filter ( $\lambda > 420$  nm). The current change of sensor was recorded by digital source-

meter at 25°C.

The response of a sensor is calculated as  $\frac{I_g - I_a}{I_a} \times 100\%$ , in which  $I_g$  and  $I_a$  are the film currents in studied gases and air, respectively. The response/recovery time refers to the time from the sensor contacting the measured gas to the current reaching 90% during response/recovery process.

## 2. Results and discussion

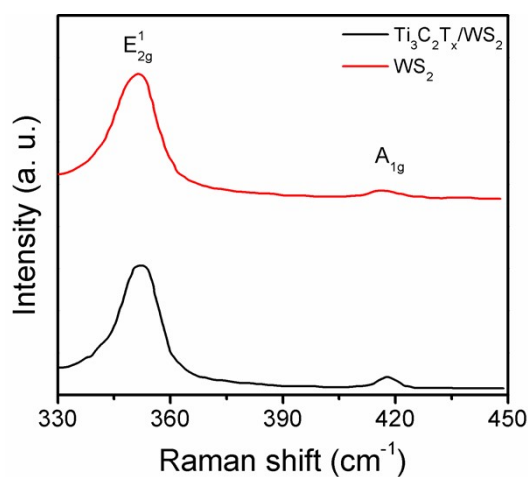

**Fig. S1.** Raman spectra of WS2 and i3C2Tx/WS2

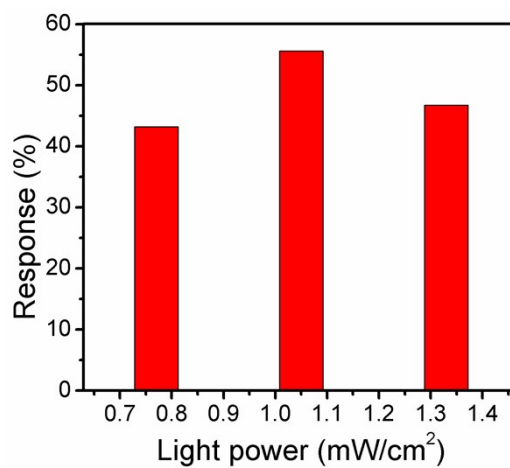

**Fig. S2.** Sensing responses of  $\text{Ti}_3\text{C}_2\text{T}_x/\text{WS}_2$  based sensors under different light intensity ( $\text{mW}\cdot\text{cm}^{-2}$ ).

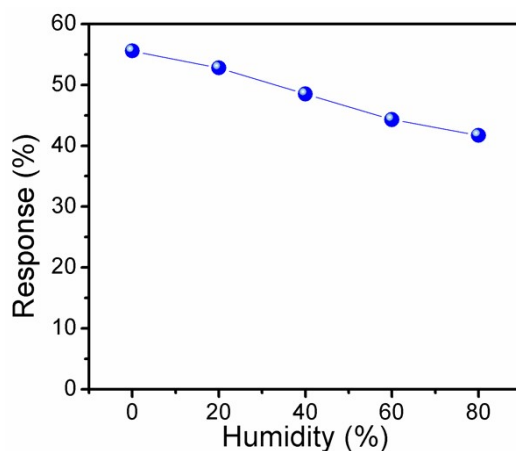

**Fig. S3.** Sensing response of  $\text{Ti}_3\text{C}_2\text{T}_x/\text{WS}_2$  based sensors under different humidity under visible illumination.

**Table S1.** Comparison of  $\text{NO}_2$  sensing performances between the developed sensor presently and reported  $\text{NO}_2$  sensors based on various nanostructures and nanohybrids.

| Sensing material                             | Temperature<br>( $^{\circ}\text{C}$ ) | $\text{NO}_2$ | Response<br>(%) | Response/recovery<br>(s) | Ref. |
|----------------------------------------------|---------------------------------------|---------------|-----------------|--------------------------|------|
| $\text{WS}_2/\text{graphene aerogel}$        | 180                                   | 2 ppm         | 10              | 100/300                  | 1    |
| $\text{WS}_2/\text{Ag}$                      | 100                                   | 500 ppm       | 16              | >500/>600                | 2    |
| Ultra-thin $\text{WS}_2$ nanosheets          | RT                                    | 5 ppm         | 36.9            | ~100/~200                | 3    |
| $\text{WS}_{2x}\text{Se}_{2-2x}$             | RT                                    | 100 ppm       | 1067            | >300/>1800               | 4    |
| $\text{WS}_2$ Nanoplates                     | RT                                    | 5 ppm         | 48.2            | >400/>1000               | 5    |
| $\text{WS}_2$ -carbon nanofiber              | RT                                    | 1 ppm         | 15              | >300>900                 | 6    |
| $\text{WS}_2/\text{ZnS}$ heterostructures    | RT                                    | 5 ppm         | 32.5            | 4/1000                   | 7    |
| $\text{MoS}_2@\text{WS}_2$ heterojunction    | RT                                    | 50 ppm        | 27              | 1.6/27.7                 | 8    |
| $\text{WS}_2/\text{rGO}$ (purple blue light) | RT                                    | 1 ppm         | 65              | >1200/>1800              | 9    |

|                                                                                |    |       |      |       |           |
|--------------------------------------------------------------------------------|----|-------|------|-------|-----------|
| Ti <sub>3</sub> C <sub>2</sub> T <sub>x</sub> /WS <sub>2</sub> (visible light) | RT | 2 ppm | 55.6 | 56/53 | This work |
|--------------------------------------------------------------------------------|----|-------|------|-------|-----------|

---

## Reference

- [1] Yan, W., Worsley, M. A., Pham, T., Zettl, A., Carraro, C., & Maboudian, R.. Effects of ambient humidity and temperature on the NO<sub>2</sub> sensing characteristics of WS<sub>2</sub>/graphene aerogel. *Applied Surface Science*, 450 (2018) 372-379.
- [2] Ko, K. Y., Song, J. G., Kim, Y., Choi, T., Shin, S., Lee, C. W., & Kim, H. Improvement of gas-sensing performance of large-area tungsten disulfide nanosheets by surface functionalization. *ACS Nano*, 10 (2016) 9287-9296.
- [3] Xu, T., Liu, Y., Pei, Y., Chen, Y., Jiang, Z., Shi, Z., & Li, X.. The ultra-high NO<sub>2</sub> response of ultra-thin WS<sub>2</sub> nanosheets synthesized by hydrothermal and calcination processes. *Sensors and Actuators B: Chemical*, 259 (2018) 789-796.
- [4] Ko, K. Y., Lee, S., Park, K., Kim, Y., Woo, W. J., Kim, D., & Kim, H.. High-Performance Gas Sensor Using a Large-Area WS<sub>2x</sub>Se<sub>2-2x</sub> Alloy for Low-Power Operation Wearable Applications. *ACS applied materials & interfaces*, 10 (2018) 34163-34171.
- [5] Koo, W. T., Cha, J. H., Jung, J. W., Choi, S. J., Jang, J. S., Kim, D. H., & Kim, I. D.. Few-Layered WS<sub>2</sub> Nanoplates Confined in Co, N-Doped Hollow Carbon Nanocages: Abundant WS<sub>2</sub> Edges for Highly Sensitive Gas Sensors. *Advanced Functional Materials*, 28 (2018) 1802575.
- [6] J.-H. Cha, S.-J. Choi, S. Yu, I.-D. Kim, 2D WS<sub>2</sub>-edge functionalized multi-channel carbon nanofibers: effect of WS<sub>2</sub> edge-abundant structure on 25°C NO<sub>2</sub> sensing, *J. Materials Chemistry A* 5 (2017) 8725–8732.

- [7] Han, Y., Liu, Y., Su, C., Wang, S., Li, H., Zeng, M., & Yang, Z.. Interface engineered WS<sub>2</sub>/ZnS heterostructures for sensitive and reversible NO<sub>2</sub> room temperature sensing. *Sensors and Actuators B: Chemical*, 296 (2019) 126666.
- [8] Ikram, M., Liu, L., Liu, Y., Ma, L., Lv, H., Ullah, M., & Shi, K.. Fabrication and characterization of a high-surface area MoS<sub>2</sub>@WS<sub>2</sub> heterojunction for the ultra-sensitive NO<sub>2</sub> detection at room temperature. *Journal of Materials Chemistry A*, 7 (2019) 14602-14612.
- [9] Paolucci, V., Emamjomeh, S. M., Ottaviano, L., & Cantalini, C.. Near room temperature light-activated WS<sub>2</sub>-decorated rGO as NO<sub>2</sub> gas sensor. *Sensors*, 19 (2019) 2617.
